# Supplementary material
Source: publisher figshare collection journal article supplement (https://acs.figshare.com/ndownloader/files/3769297)
Supplement: Supplementary file 1 [file 3769297]

# Supporting Information

## Ultrafast Electron and Hole Relaxation Pathways in Few-Layer MoS<sub>2</sub>

*Zhaogang Nie,<sup>a</sup> Run Long,<sup>b,c,d</sup> Jefri S. Teguh,<sup>a</sup> Chung-Che Huang,<sup>e</sup> Daniel W. Hewak,<sup>e</sup> Edwin K. L. Yeow,<sup>a</sup> Zexiang Shen,<sup>f,g,h</sup> Oleg V. Prezhdo,<sup>b\*</sup> and Zhi-Heng Loh<sup>a,f\*</sup>*

<sup>a</sup> Division of Chemistry and Biological Chemistry, School of Physical and Mathematical Sciences, Nanyang Technological University, Singapore 637371, Singapore

<sup>b</sup> Department of Chemistry, University of Southern California, Los Angeles, California 90089, United States

<sup>c</sup> School of Physics, Complex Adaptive Systems Laboratory, University College Dublin, Belfield, Dublin 4, Ireland

<sup>d</sup> College of Chemistry, Key Laboratory of Theoretical & Computational Photochemistry of Ministry of Education, Beijing Normal University, Beijing, 100875, P. R. China.

<sup>e</sup> Optoelectronics Research Centre, University of Southampton, Southampton SO17 1BJ, United Kingdom

<sup>f</sup> Division of Physics and Applied Physics, School of Physical and Mathematical Sciences, Nanyang Technological University, Singapore 637371, Singapore

<sup>g</sup> Centre for Disruptive Photonic Technologies, School of Physical and Mathematical Sciences, Nanyang Technological University, Singapore 637371, Singapore

<sup>h</sup> Division of Materials Technology, School of Materials Science and Engineering, Nanyang Technological University, Singapore 639798, Singapore

---

\* Corresponding Authors: (O.V.P.) E-mail: prezhdo@usc.edu. Telephone: +1 (213) 821-3116. (Z.-H.L.) E-mail: zhiheng@ntu.edu.sg. Telephone: +65 6592-1655.

## 1. Fit Parameters for Intravalley Electronic Relaxation Dynamics

The temporal evolution of the spectral first moment  $\langle \lambda^{(1)}(t) \rangle$  computed about the exciton B transition is fit to a Gaussian decay function of the form

$$\langle \lambda^{(1)}(t) \rangle = \Delta\lambda e^{-t^2/2(\tau_e^{(1)})^2} + \lambda_0 \quad (\text{S1})$$

where  $\Delta\lambda$  is the amplitude of the blueshift,  $\tau_e^{(1)}$  is the Gaussian decay time, and  $\lambda_0$  is the offset wavelength. The fit parameters are summarized in Table S1 below.

**Table S1.** Fit parameters extracted from  $\langle \lambda^{(1)}(t) \rangle$ .

| Fluence (mJ/cm <sup>2</sup> ) | $\Delta\lambda$ (nm) | $\tau_e^{(1)}$ (ps) | $\lambda_0$ (nm) |
|-------------------------------|----------------------|---------------------|------------------|
| 0.06                          | $21.4 \pm 0.7$       | $1.77 \pm 0.08$     | $602.2 \pm 0.6$  |
| 0.14                          | $20.9 \pm 0.2$       | $1.34 \pm 0.02$     | $602.4 \pm 0.1$  |
| 0.29                          | $13.3 \pm 0.1$       | $1.34 \pm 0.02$     | $610.4 \pm 0.1$  |

From the above, it is seen that the offset wavelength  $\lambda_0$  increases with excitation fluence. This trend is consistent with increased band gap renormalization at larger carrier densities, resulting in a decrease in the band gap with increasing carrier density.

## 2. Calculation of the Excess Energies of the Carriers

The excess energies of the carriers are calculated by first determining the threshold wavelength for the direct-gap optical absorption at the K valley. The threshold wavelength is ascertained to be 759 nm from the linear fits to the baseline and the absorption peak (Figure S1). Given that the absorption maximum of the exciton A transition resides at 684 nm, the total excess energy of the carriers is therefore  $1440 \text{ cm}^{-1}$ . By employing the  $m_e^*/m_h^*$  ratio of 1.76 obtained from first-principles electronic structure calculations,<sup>1</sup> the excess energies of the

electron and hole are calculated to be  $620 \pm 230$  and  $820 \pm 290$   $\text{cm}^{-1}$ , respectively. The relatively large error margins arise from the presence of an exponentially decaying absorption feature in the long wavelength region that is due to indirect transitions. This long-wavelength absorption tail introduces uncertainty in determining the appearance threshold of the absorption peak.

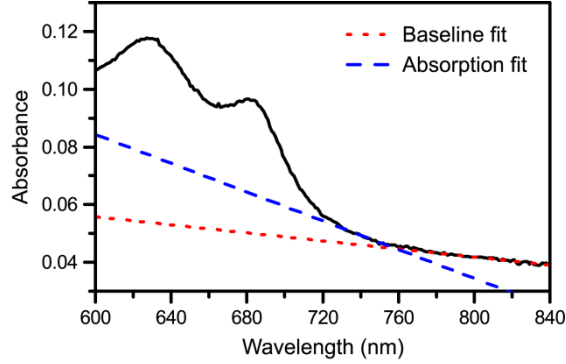

**Figure S1.** Determination of the threshold wavelength for the direct-gap optical absorption of the five-layer MoS<sub>2</sub> sample. The optical absorption spectrum acquired at 300 K is shown as the solid line. The threshold wavelength is given by the intersection between the linear fits to the baseline (dotted line) and to the absorption peak (dashed line).

### 3. Reconstructed transmission spectrum of the pure photoexcited sample

The differential transmission signal  $\Delta T/T$  is directly obtained by measuring the transmitted intensity of the probe with ( $I_{on}$ ) and without ( $I_{off}$ ) the pump beam. That is,

$$\Delta T/T = (I_{on} - I_{off})/I_{off}. \quad (\text{S1})$$

To reconstruct the transmission spectrum of the pure photoexcited species  $T_e$ , one requires knowledge of the excitation fraction  $f$  and the intensity of the probe beam before the sample ( $I_0$ ).

While the former can be determined, the latter is not usually measured in the experiments.

Nevertheless,  $T_e$  can be reconstructed from the measured  $\Delta T/T$  spectrum and an independently measured ground-state sample transmission spectrum  $T$  by employing the expression

$$T_e = T \left( \frac{\Delta T}{T} + 1 \right)^{1/f}. \quad (\text{S2})$$

The above procedure is used to reconstruct the transmission spectrum of the pure photoexcited species that is produced by the excitation of five-layer MoS<sub>2</sub> sample at 300 K with a pump fluence of 0.29 mJ/cm<sup>2</sup> (see Fig. 6c of the main text). The resultant transmission spectrum is dominated by a  $T_e > 1$  feature (Fig. S2), which is consistent with probe pulse-induced stimulated emission. However, it is important to note that the absolute value of  $T_e$  is highly sensitive to the excitation fraction  $f$ , which itself is challenging to quantify accurately. The  $T_e$  spectrum should therefore be analyzed only qualitatively.

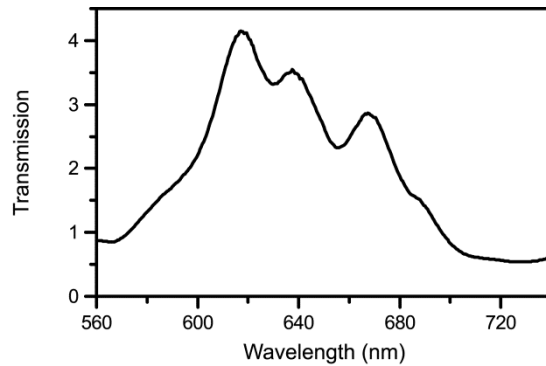

**Figure S2.** Reconstructed transmission spectrum of the pure photoexcited species at a time delay of 200 fs following excitation of the five-layer MoS<sub>2</sub> sample at 300 K with a pump fluence of 0.29 mJ/cm<sup>2</sup>.

#### 4. Resonant Raman Spectrum of Five-Layer MoS<sub>2</sub>

The resonant Raman spectrum of the five-layer MoS<sub>2</sub> sample is recorded at 295 K on a Horiba LabRAM HR instrument with 632.8-nm irradiation. The Raman spectrum and its second derivative spectrum are shown in Figure S3.

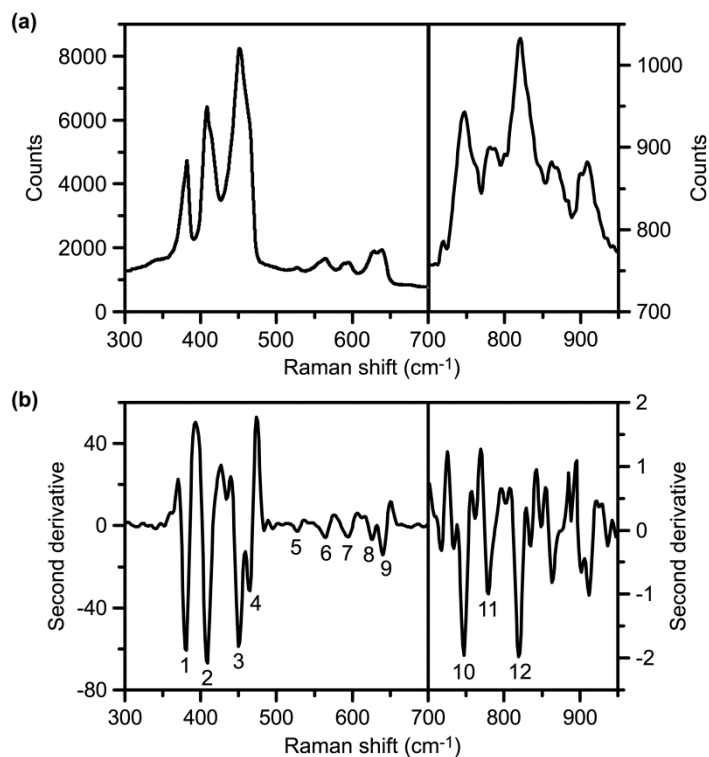

**Figure S3.** (a) Resonant Raman spectrum for the five-layer MoS<sub>2</sub> sample and (b) its second-derivative spectrum.

The labeled peaks in the second-derivative spectrum are assigned according to previous reports in the literature.<sup>2-4</sup> The assignment is given in Table S2 below.

**Table S2.** Assignment of peaks observed in the resonant Raman spectrum of five-layer MoS<sub>2</sub>.

The peak numbers are used to identify the negative-valued minima observed in the second-derivative spectrum (Figure S2b).

| Peak No. | Frequency (cm <sup>-1</sup> ) | Assignment                                             |
|----------|-------------------------------|--------------------------------------------------------|
| 1        | 381                           | E <sub>2g</sub> <sup>1</sup> (Γ)                       |
| 2        | 409                           | A <sub>1g</sub> (Γ)                                    |
| 3        | 450                           | 2LA(M)                                                 |
| 4        | 465                           | A <sub>2u</sub> (Γ)                                    |
| 5        | 528                           | E <sub>1g</sub> (M) + LA(M)                            |
| 6        | 565                           | 2E <sub>1g</sub> (Γ)                                   |
| 7        | 594                           | E <sub>2g</sub> <sup>1</sup> (Γ) + LA(M)               |
| 8        | 626                           | unknown                                                |
| 9        | 640                           | A <sub>1g</sub> (M) + LA(M)                            |
| 10       | 747                           | 2E <sub>2g</sub> <sup>1</sup> (M)                      |
| 11       | 779                           | A <sub>1g</sub> (M) + E <sub>2g</sub> <sup>1</sup> (M) |
| 12       | 819                           | 2A <sub>1g</sub> (Γ) or 2A <sub>1g</sub> (M)           |

The unknown peak at 626 cm<sup>-1</sup> was also observed in earlier resonant Raman measurements of few-layer MoS<sub>2</sub> samples,<sup>4</sup> although its origin remains unknown.

## 5. Measured Optical Pump-Probe Cross-Correlation

The time resolution of the experimental apparatus is measured by performing a second-order pump-probe intensity cross-correlation with a 10-μm-thick BBO crystal located at the sample position. The resultant cross-correlation trace yields a full-width at half-maximum (FWHM) of 83 fs (Figure S4).

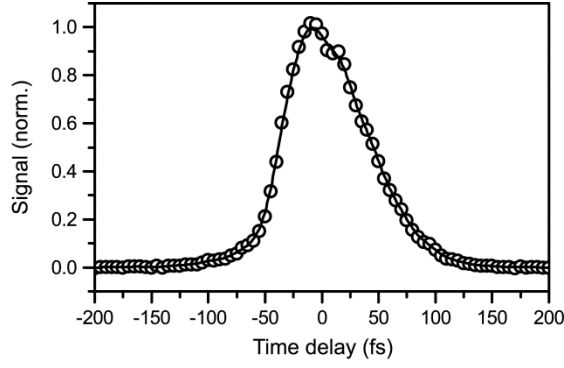

**Figure S4.** Cross-correlation trace of the pump and probe pulses. The FWHM is 83 fs.

## 6. Pump Fluence-Dependence Measurements

Pump fluence-dependence measurements were performed to verify that photoexcitation of the sample occurs in the linear regime. Figure S5 shows a log-log plot of the peak  $\Delta T/T$  signal  $S$  obtained at the B exciton transition as a function of fluence  $F$ . Because  $S \propto F^N$ , the slope of the log-log plot yields the photon order  $N$ , which in this case is found to be  $1.05 \pm 0.06$ . This result confirms that excitation of the MoS<sub>2</sub> sample under our experimental conditions occurs in the linear regime.

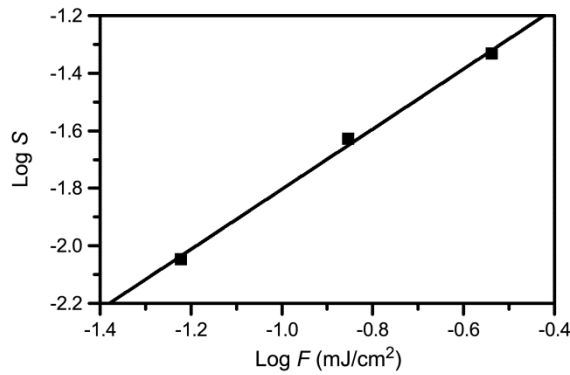

**Figure S5.** Dependence of the maximum  $\Delta T/T$  signal on the pump fluence, confirming one-photon excitation of the sample.

## References

1. Qiu, D. Y.; da Jornada, F. H.; Louie, S. G. Optical Spectrum of MoS<sub>2</sub>: Many-Body Effects and Diversity of Exciton States. *Phys. Rev. Lett.* **2013**, *111*, 216805.
2. Chen, J. M.; Wang, C. S. Second Order Raman Spectrum of MoS<sub>2</sub>. *Solid State Commun.* **1974**, *14*, 857–860.
3. Stacy, A. M.; Hodul, D. T. Raman Spectra of IVB and VIB Transition Metal Disulfides Using Laser Energies Near the Absorption Edges. *J. Phys. Chem. Solids* **1985**, *46*, 405–409.
4. Chakraborty, B.; Ramakrishna Matte, H. S. S.; Sood, A. K.; Rao, C. N. R. Layer-Dependent Resonant Raman Scattering of a Few Layer MoS<sub>2</sub>. *J. Raman Spectrosc.* **2013**, *44*, 92–96.
